# Supplementary material for: Mn3O4nanoparticles on layer-structured Ti3C2MXene towards the oxygen reduction reaction and zinc–air batteries
Source: Royal Society of Chemistry journal article supplement (doi:10.1039/c7ta04532h), 2017-01-01
Supplement: c7ta04532h1.pdf [file c7ta04532h1.pdf]

## Supporting Information

### **Mn<sub>3</sub>O<sub>4</sub> Nanoparticles on Layer-Structured Ti<sub>3</sub>C<sub>2</sub> MXene towards Oxygen Reduction Reaction and Zinc-air Battery**

*Qi Xue, Zengxia Pei, Yan Huang, Minshen Zhu, Zijie Tang, Hongfei Li, Yang Huang, Na Li, Haiyan Zhang and Chunyi Zhi\**

#### **Preparation of Ti<sub>3</sub>C<sub>2</sub> MXene**

Ti<sub>3</sub>AlC<sub>2</sub> (1 g) powder was immersed in 10 mL 48% HF, and stirred for 20 h at room temperature. The obtained powder was then rinsed multiple times with deionized water. The powder pellet was retrieved by centrifugation at 3500 rpm for 10 min, and the supernatant was discarded. The final product (Ti<sub>3</sub>C<sub>2</sub>T<sub>x</sub> powder) was dried at 80 °C under vacuum for 12 h.

The mass/atomic ratio between Mn<sub>3</sub>O<sub>4</sub> and MXene (Mn<sub>3</sub>O<sub>4</sub> and AB) were calculated according to synthesis method. The mass ratio between Mn<sub>3</sub>O<sub>4</sub> and MXene is about 30.5/10, the mass ratio between Mn<sub>3</sub>O<sub>4</sub> and AB is about 30.5/10. In addition, atomic ratio between Mn<sub>3</sub>O<sub>4</sub> and MXene is about 20/9. Since the AB is composed of carbon atoms, the atomic ratio between Mn<sub>3</sub>O<sub>4</sub> and AB is around 12/75.

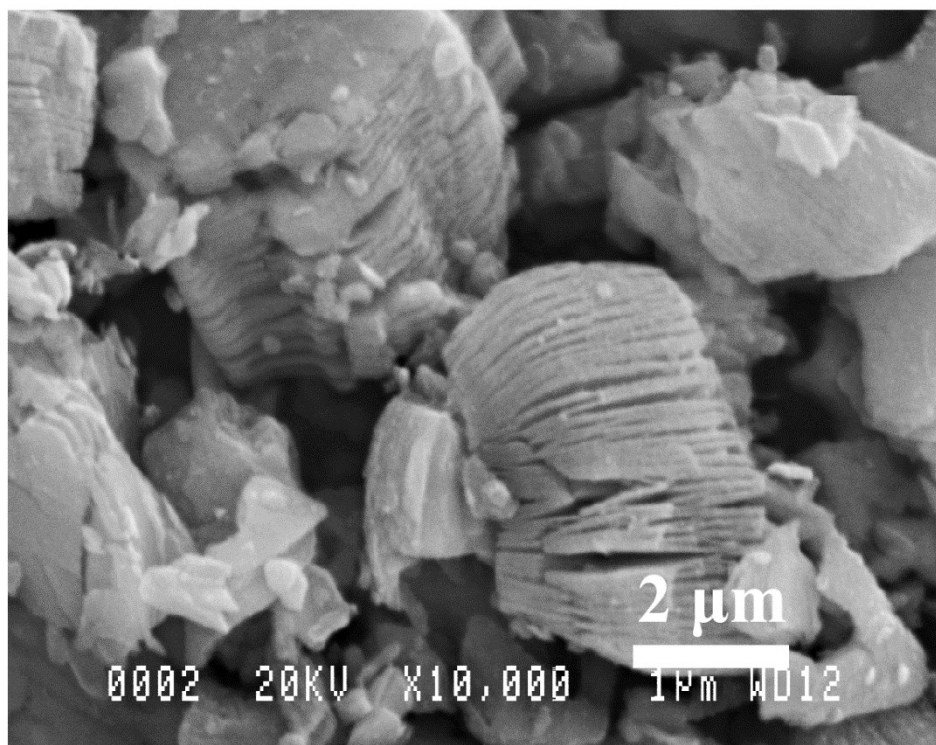

Fig. S1 SEM image of as-synthesized layered  $\text{Ti}_3\text{C}_2$  MXene.

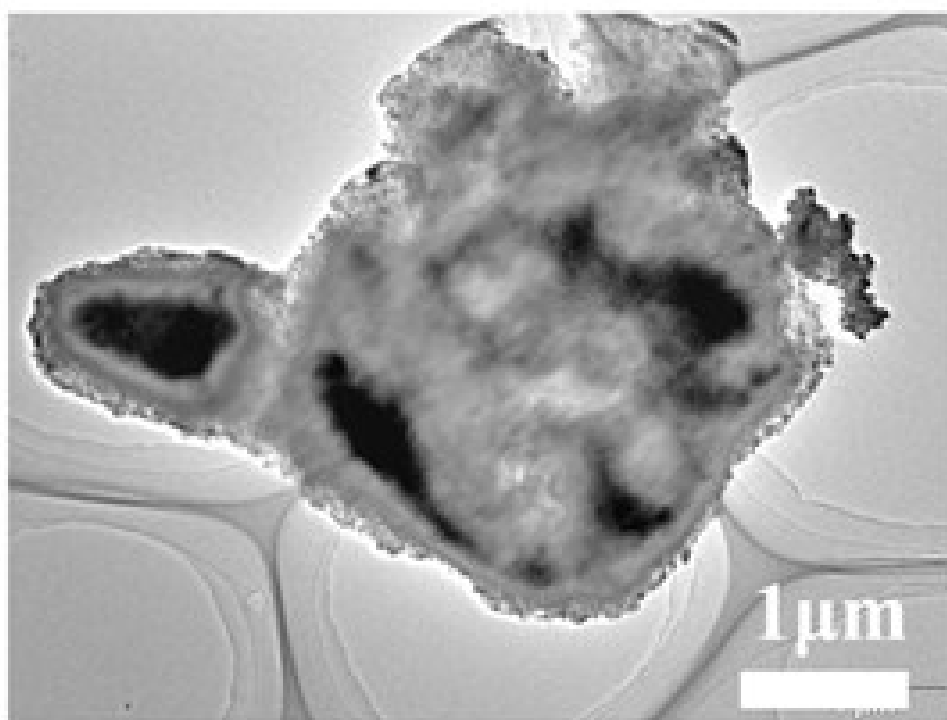

Fig. S2 TEM image of  $\text{Mn}_3\text{O}_4/\text{MXene}$  nanocomposite under low resolution.

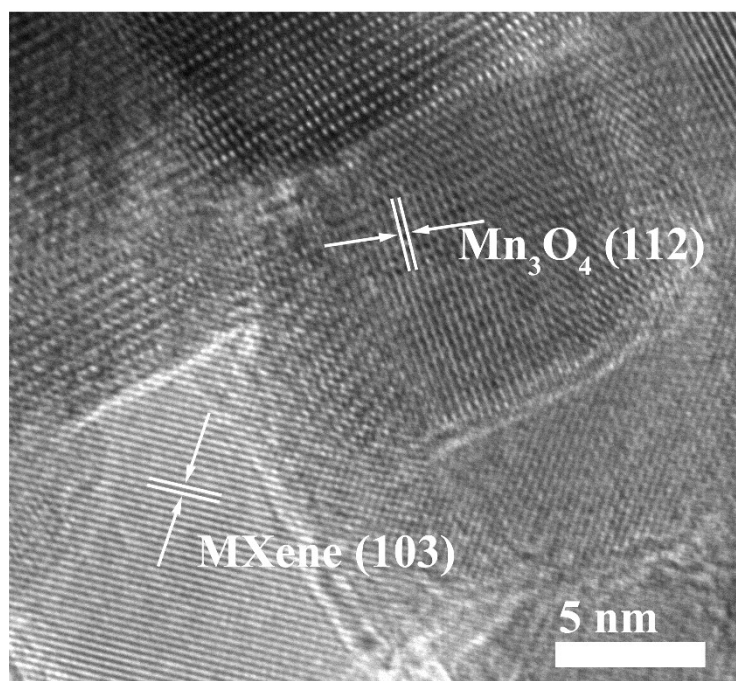

Fig. S3 HRTEM image of Mn<sub>3</sub>O<sub>4</sub>/MXene nanocomposite.

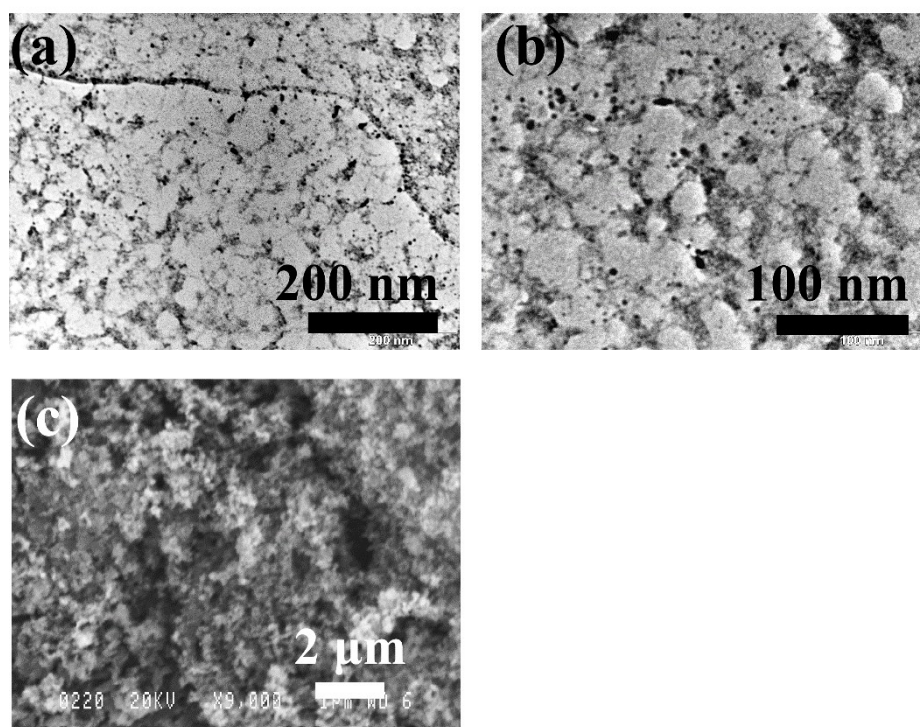

Fig. S4(a) and (b) TEM images of Mn<sub>3</sub>O<sub>4</sub>/AB nanocomposite. (c) SEM image of Mn<sub>3</sub>O<sub>4</sub>/AB nanocomposite.

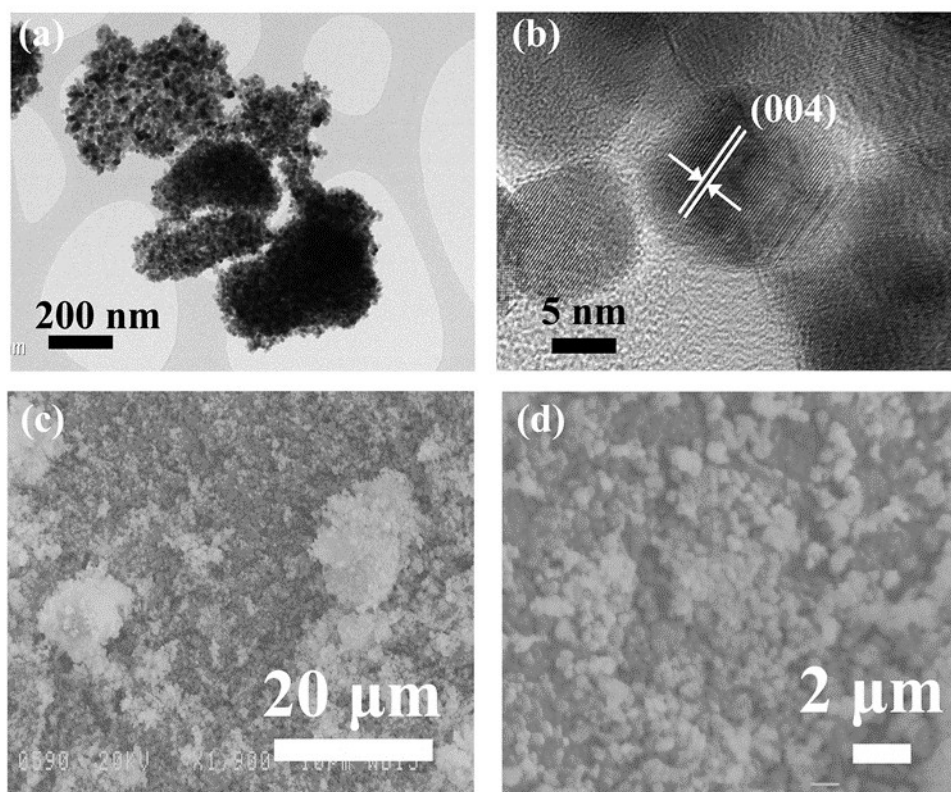

Fig. S5 TEM image (a) and HRTEM image (b) of  $\text{Mn}_3\text{O}_4$  nanoparticles. (c) and (d) SEM images of  $\text{Mn}_3\text{O}_4$  nanoparticles.

The synthesis method of  $\text{Mn}_3\text{O}_4$  nanoparticles is same as the synthesis of  $\text{Mn}_3\text{O}_4/\text{MXene}$  without adding of MXene. Lattice fringes with an inner-plane spacing at 0.234 nm displayed in HRTEM image of  $\text{Mn}_3\text{O}_4$  nanoparticles, which can be attributed to (004) planes of hausmannite (Fig. S4b).<sup>[1]</sup> The morphology of  $\text{Mn}_3\text{O}_4$  nanoparticles depicted in Fig. S4c and Fig.S4d is in consistent with the morphology of  $\text{Mn}_3\text{O}_4$  nanoparticles in Fig. 2a and Fig. 2b.

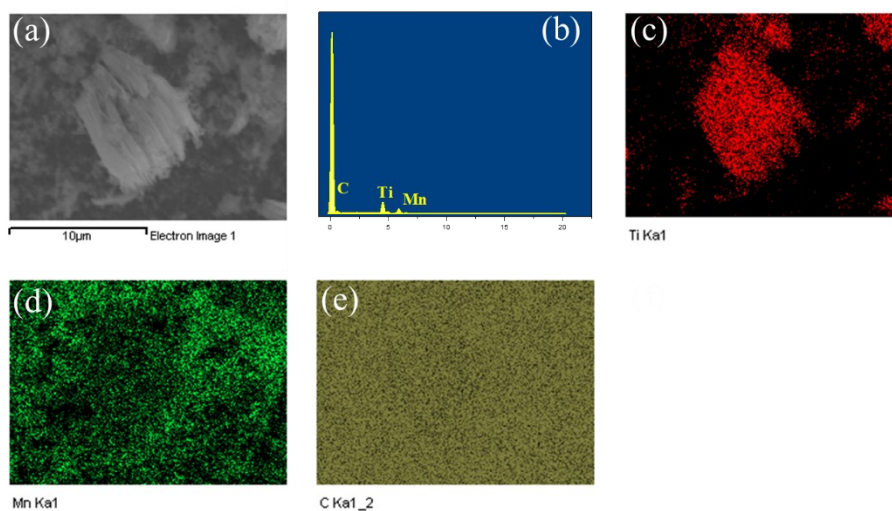

Fig. S6 (a) SEM image of Mn<sub>3</sub>O<sub>4</sub>/MXene. (b) Element composition of Mn<sub>3</sub>O<sub>4</sub>/MXene. (c) Element mapping images of Ti. (d) Element mapping images of Mn. (e) Element mapping images of C.

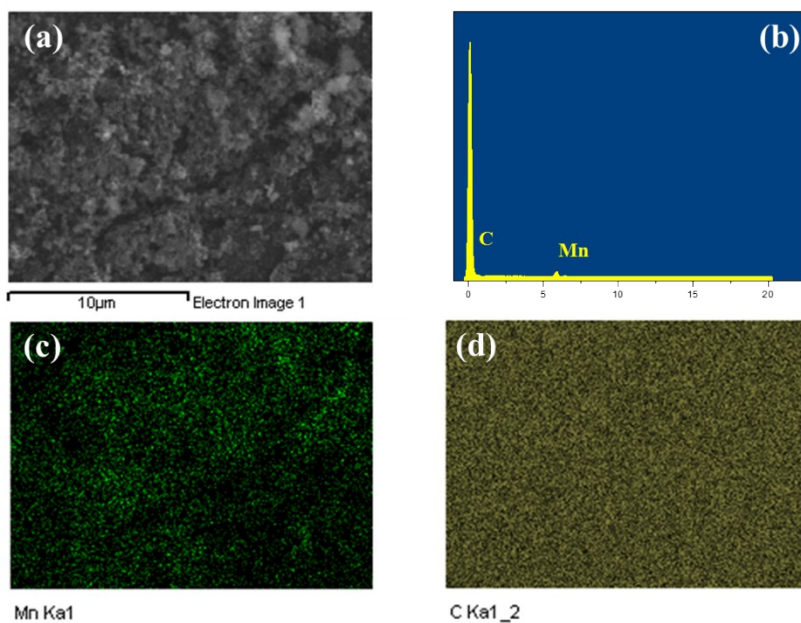

Fig. S7 (a) SEM image of Mn<sub>3</sub>O<sub>4</sub>/AB. (b) Element composition of Mn<sub>3</sub>O<sub>4</sub>/AB. (c) Element mapping images of Mn. (d) Element mapping images of Mn.



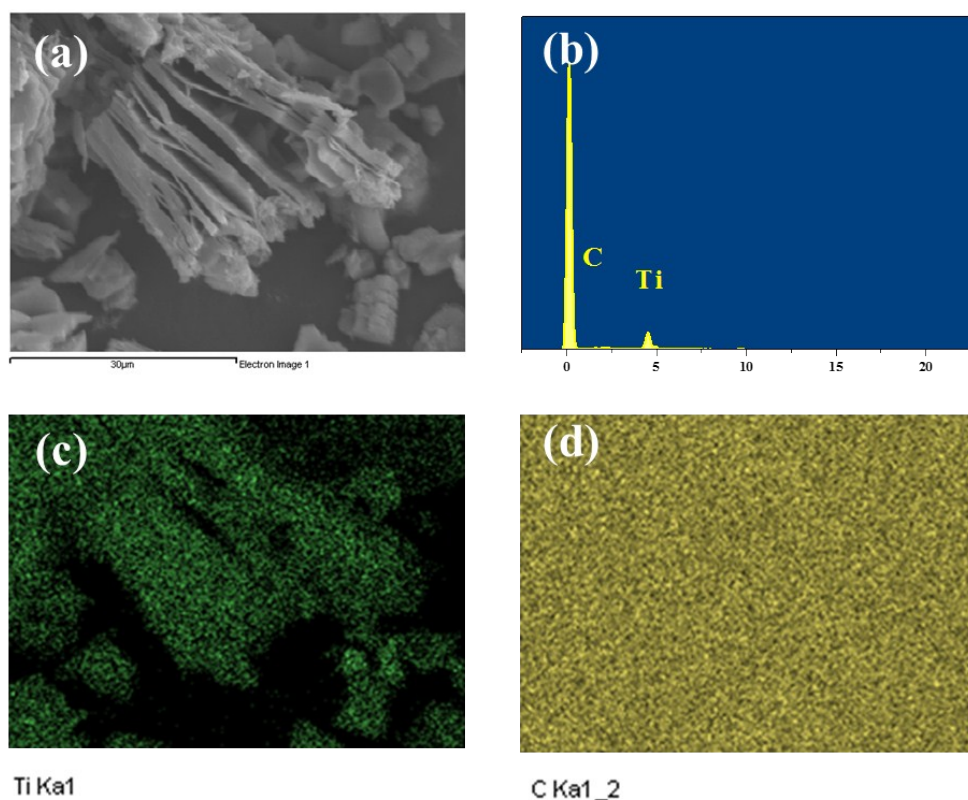

Fig. S8 (a) SEM image of layered  $\text{Ti}_3\text{C}_2$  MXene in control experiment. (b) Element composition of corresponding  $\text{Ti}_3\text{C}_2$  MXene. Element mapping images of Ti (c) and C (d) of corresponding  $\text{Ti}_3\text{C}_2$  MXene.

As exhibited in Fig. S7, the  $\text{Ti}_3\text{C}_2$  MXene in control experiment still retain the layered structure of MXene owing to the mild reaction condition.<sup>[2]</sup>

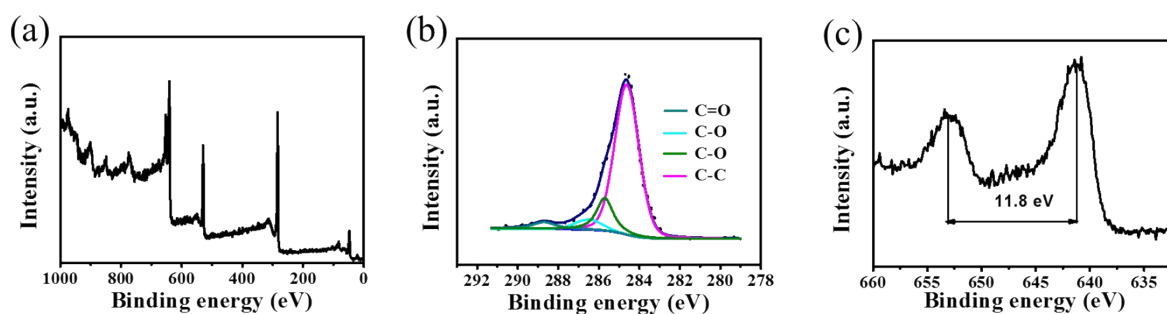

Fig. S9 XPS spectra of AB with  $\text{Mn}_3\text{O}_4$  nanoparticles. (a) Full spectra. (b) High-resolution  $\text{C}1\text{s}$  spectrum. (c) High-resolution  $\text{Mn}2\text{p}$  spectrum.

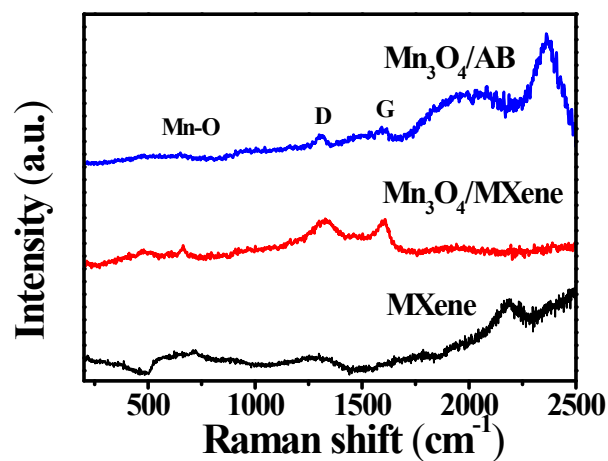

Fig. S10 Raman spectra of  $\text{Mn}_3\text{O}_4/\text{AB}$ ,  $\text{Mn}_3\text{O}_4/\text{MXene}$ , and MXene.

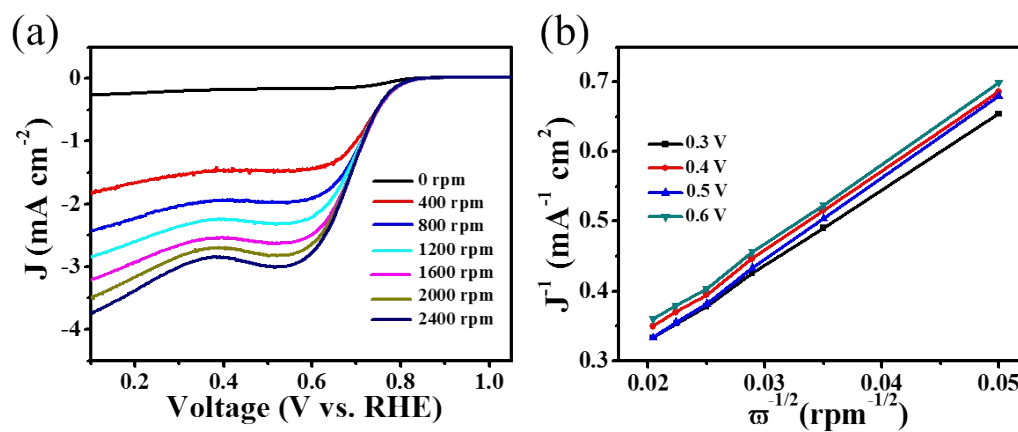

Fig. S11 (a) LSV curves of  $\text{Mn}_3\text{O}_4/\text{AB}$  at different rotating speed with a sweep rate of 5 mV/s. (b) Calculated K–L plots of  $\text{Mn}_3\text{O}_4/\text{AB}$ . Catalyst loading was 0.1 mg/cm<sup>2</sup>.

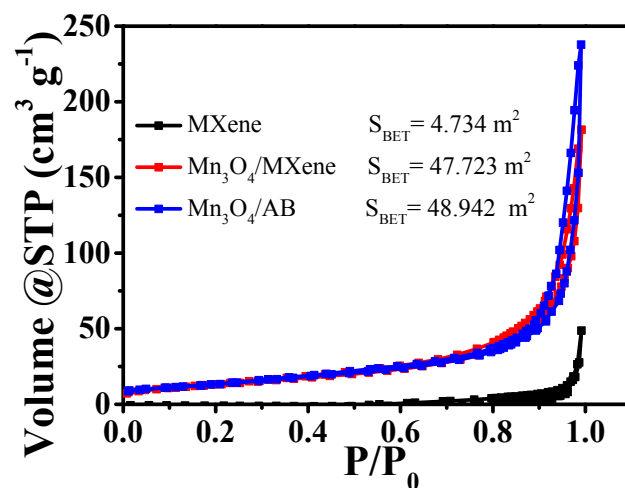

Fig. S12 Nitrogen adsorption-desorption isotherms of MXene,  $\text{Mn}_3\text{O}_4/\text{MXene}$ , and  $\text{Mn}_3\text{O}_4/\text{AB}$ . Inset is the specific surface areas of corresponding samples.

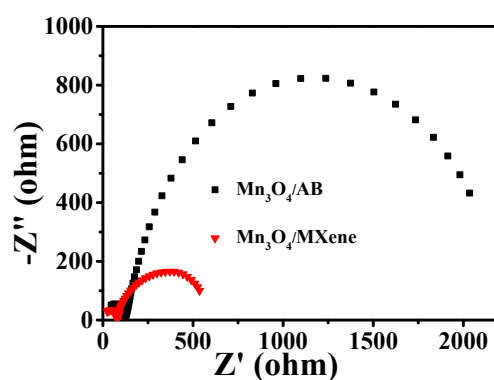

Fig. S13 Electrochemical impedance spectroscopy (EIS) spectrum of  $\text{Mn}_3\text{O}_4/\text{MXene}$  and  $\text{Mn}_3\text{O}_4/\text{AB}$  sample in 0.1 M KOH. Data were collected for the electrodes at -0.3 V (vs. Ag/AgCl) ranging from 1 Hz to 1 MHz.



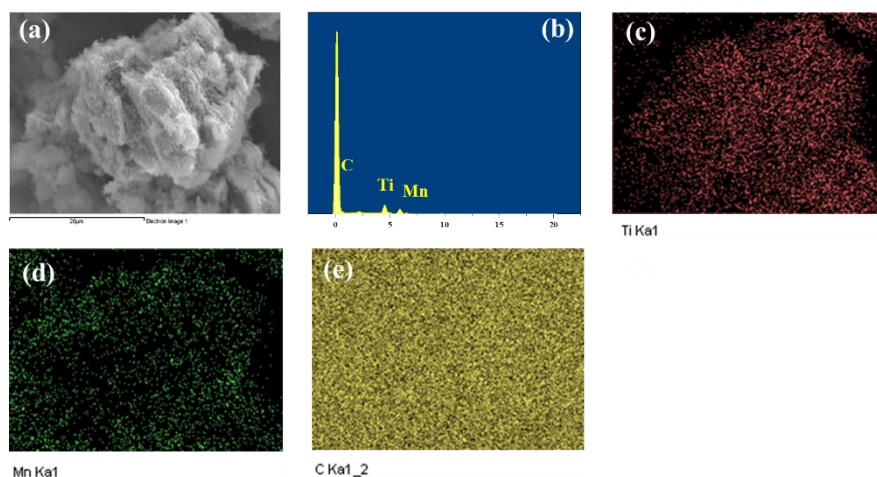

Fig. S14 (a) SEM image of Mn<sub>3</sub>O<sub>4</sub>/MXene after 40 h-stability test. (b) Element composition of Mn<sub>3</sub>O<sub>4</sub>/MXene after 40 hour-stability test. (c) Element mapping images of Ti. (d) Element mapping images of Mn. (e) Element mapping images of C.

After long-term stability test, the Mn<sub>3</sub>O<sub>4</sub>/MXene sample still retains the main layered structure.

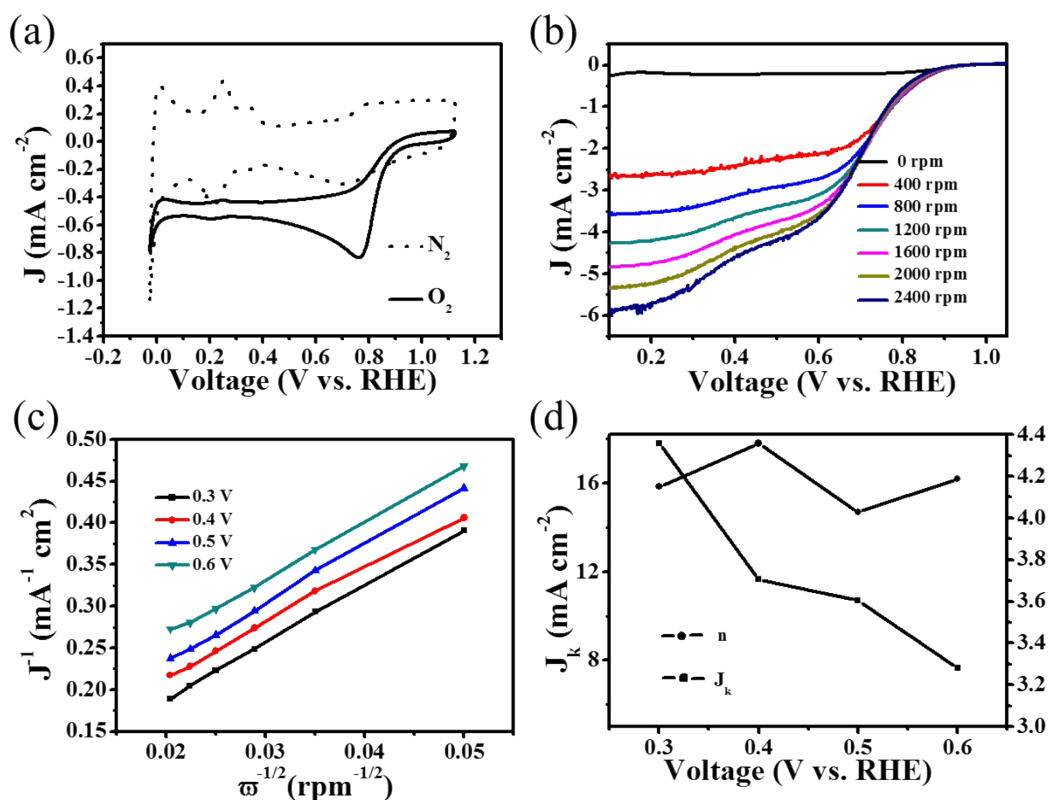

Fig. S15 (a) CV curves of Pt/C in O<sub>2</sub>-saturated and N<sub>2</sub>-saturated 0.1 M KOH solution (b) LSV curves of Pt/C at different rotating speed with a sweep rate of 5 mV/s. (c) Calculated K-L plots of Pt/C. (d) n - J<sub>k</sub> curve. Catalyst loading was 0.1 mg cm<sup>2</sup>.

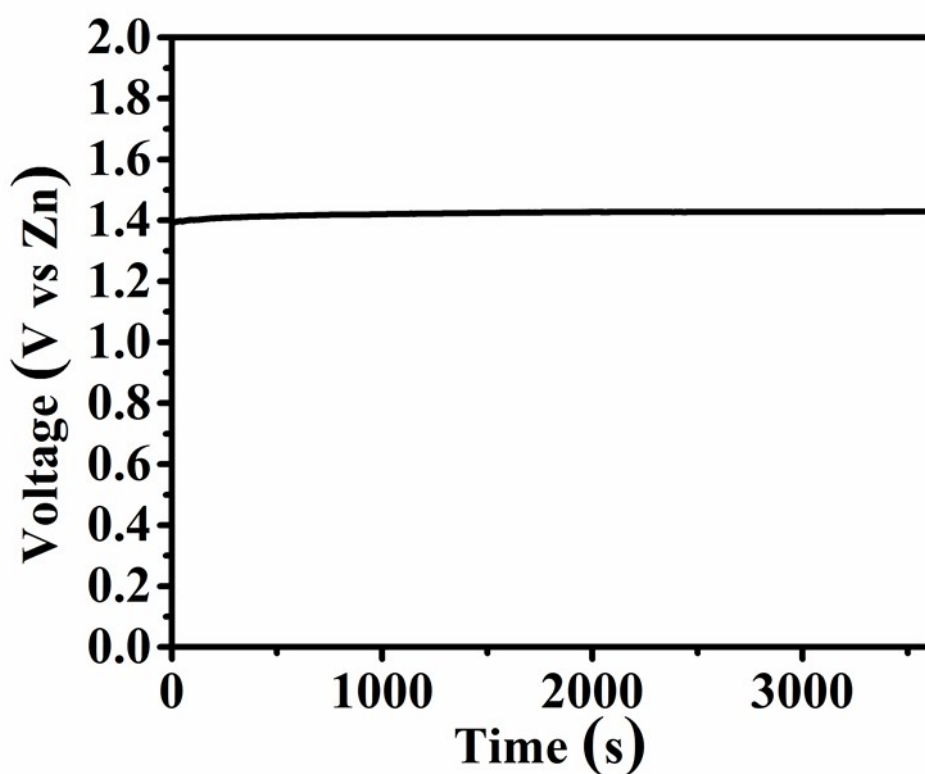

Fig. S16 Open potential of as-prepared zinc-air battery in an hour.

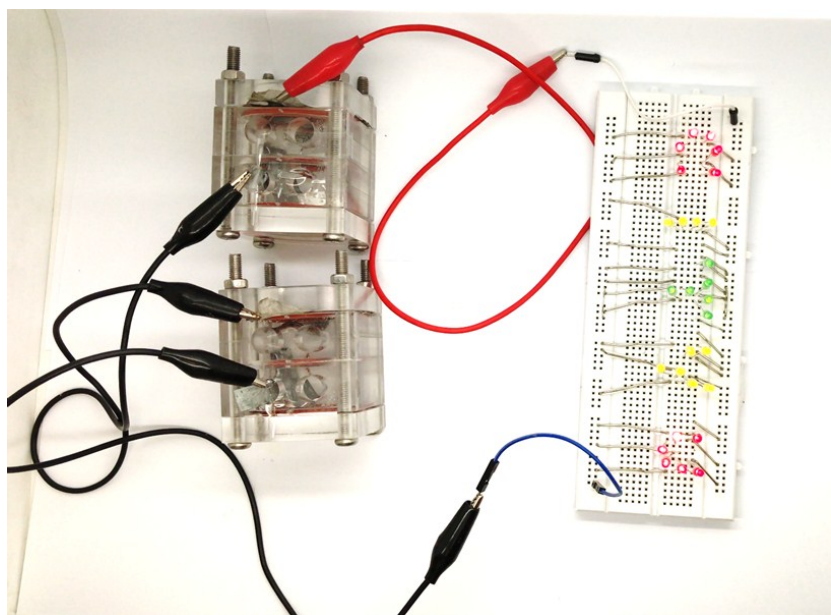

Fig. S17 Picture of connected zinc-air batteries powering a series of LEDs.

1. Duan, J. J.; Chen, S.; Dai, S.; Qiao, S. Z., *Adv. Funct. Mater.* **2014**, *24*, 2072.
2. Naguib, M.; Mashtalir, O.; Lukatskaya, M. R.; Dyatkin, B.; Zhang, C.; Presser, V.; Gogotsi, Y.; Barsoum, M. W., *Chem. Commun.* **2014**, *50*, 7420.
